# Supplementary material for: Genetic mapping and evolutionary analysis of human-expanded cognitive networks
Source: PubMed Central journal article supplement (PMC6813316; doi:10.1038/s41467-019-12764-8), 2019-10-24
Supplement: 41467_2019_12764_MOESM3_ESM.pdf [file 41467_2019_12764_MOESM3_ESM.pdf]

## **Description of Additional Supplementary Files**

File Name: Supplementary Data 1

Description: Cortical surface area expansion between the chimpanzee and human.

File Name: Supplementary Data 2

Description: List of HAR and HAR-BRAIN genes.

File Name: Supplementary Data 3

Description: List of DMN genes.
