# Supplementary material for: Genetic mapping and evolutionary analysis of human-expanded cognitive networks
Source: PubMed Central journal article supplement (PMC6813316; doi:10.1038/s41467-019-12764-8), 2019-10-24
Supplement: 41467_2019_12764_MOESM7_ESM.pdf [file 41467_2019_12764_MOESM7_ESM.pdf]

## Reporting Summary

Nature Research wishes to improve the reproducibility of the work that we publish. This form provides structure for consistency and transparency in reporting. For further information on Nature Research policies, see [Authors & Referees](#) and the [Editorial Policy Checklist](#).

### Statistics

For all statistical analyses, confirm that the following items are present in the figure legend, table legend, main text, or Methods section.

n/a Confirmed

- The exact sample size ( $n$ ) for each experimental group/condition, given as a discrete number and unit of measurement
- A statement on whether measurements were taken from distinct samples or whether the same sample was measured repeatedly
- The statistical test(s) used AND whether they are one- or two-sided  
*Only common tests should be described solely by name; describe more complex techniques in the Methods section.*
- A description of all covariates tested
- A description of any assumptions or corrections, such as tests of normality and adjustment for multiple comparisons
- A full description of the statistical parameters including central tendency (e.g. means) or other basic estimates (e.g. regression coefficient) AND variation (e.g. standard deviation) or associated estimates of uncertainty (e.g. confidence intervals)
- For null hypothesis testing, the test statistic (e.g.  $F$ ,  $t$ ,  $r$ ) with confidence intervals, effect sizes, degrees of freedom and  $P$  value noted  
*Give  $P$  values as exact values whenever suitable.*
- For Bayesian analysis, information on the choice of priors and Markov chain Monte Carlo settings
- For hierarchical and complex designs, identification of the appropriate level for tests and full reporting of outcomes
- Estimates of effect sizes (e.g. Cohen's  $d$ , Pearson's  $r$ ), indicating how they were calculated

*Our web collection on [statistics for biologists](#) contains articles on many of the points above.*

### Software and code

Policy information about [availability of computer code](#)

Data collection

Data from the BrainMap database were collected using the Sleuth toolbox (version 2.4; <http://www.brainmap.org/sleuth>).

Data analysis

The MRI data were analyzed using FreeSurfer (v5.3.0; <http://surfer.nmr.mgh.harvard.edu>) and FSL (v5.0, <http://fsl.fmrib.ox.ac.uk>).  
The Genotype data were analyzed using PLINK (v2.0; <https://cog-genomics.org/plic2>).  
Gene annotation was performed using FUMA (<https://fuma.ctglab.nl>).  
Gene-set analysis was performed using MAGMA (v1.07; <https://ctg.cncr.nl/software/magma>).  
All other data were analyzed using custom-written MATLAB code, based on MATLAB R2018a (MathWorks, Natick, USA).

For manuscripts utilizing custom algorithms or software that are central to the research but not yet described in published literature, software must be made available to editors/reviewers. We strongly encourage code deposition in a community repository (e.g. GitHub). See the Nature Research [guidelines for submitting code & software](#) for further information.

### Data

Policy information about [availability of data](#)

All manuscripts must include a [data availability statement](#). This statement should provide the following information, where applicable:

- Accession codes, unique identifiers, or web links for publicly available datasets
- A list of figures that have associated raw data
- A description of any restrictions on data availability

The human gene expression data that support the findings of this study are available in the Allen Brain Atlas (<http://human.brain-map.org>).  
The comparative gene expression data that support the findings of this study are available in the PsychENCODE (<http://evolution.psychencode.org>).  
The human MRI data (in the part of the cortical expansion) that support the findings of this study are available from the Human Connectome Project (<https://www.humanconnectome.org>).  
The chimpanzee MRI data that support the findings of this study are available as part of the National Chimpanzee Brain Resources ([www.chimpanzeebrain.org](http://www.chimpanzeebrain.org)).  
The genotype data (in the GWAS part) that support the findings of this study are available in the UK Biobank (application 16406; <https://www.ukbiobank.ac.uk>).

The GWAS summary statistics for "intelligence" that support the findings of this study are available from the lab's website ([https://ctg.cncr.nl/software/summary\\_statistics](https://ctg.cncr.nl/software/summary_statistics)).

The GWAS summary statistics for "schizophrenia" that support the findings of this study are available from the Psychiatric Genomics Consortium (<http://www.med.unc.edu/pgc>).

The GWAS summary statistics for "Frequency of friend/family visits" that support the findings of this study are available from the GWAS ATLAS webtool (<http://atlas.ctg.nl/traitDB/3216>).

The cross-disorder VBM data that support the findings of this study are available in the BrainMap (<http://www.brainmap.org>).

## Field-specific reporting

Please select the one below that is the best fit for your research. If you are not sure, read the appropriate sections before making your selection.

Life sciences  Behavioural & social sciences  Ecological, evolutionary & environmental sciences

For a reference copy of the document with all sections, see [nature.com/documents/nr-reporting-summary-flat.pdf](https://www.nature.com/documents/nr-reporting-summary-flat.pdf)

## Life sciences study design

All studies must disclose on these points even when the disclosure is negative.

|                 |                                                                                                                                                                                                                                                                                                                                                                                                                                                                                                                                                                                                                                                                                                                                                             |
|-----------------|-------------------------------------------------------------------------------------------------------------------------------------------------------------------------------------------------------------------------------------------------------------------------------------------------------------------------------------------------------------------------------------------------------------------------------------------------------------------------------------------------------------------------------------------------------------------------------------------------------------------------------------------------------------------------------------------------------------------------------------------------------------|
| Sample size     | Sample size of the human MRI data was determined by matching the available chimpanzee MRI data. Sample size of other data was based on data availability. No statistical methods were used to pre-determine sample size.                                                                                                                                                                                                                                                                                                                                                                                                                                                                                                                                    |
| Data exclusions | For the genotype data, all files were checked for data integrity and accuracy. SNPs were filtered from further analysis if they met any of the following criteria: imputation quality (INFO/R2) score < 0.6, Hardy–Weinberg equilibrium $p < 5e-6$ , minor allele frequency (MAF) < 0.005, and mismatch of alleles or allele frequency difference greater than 20% from the Haplotype HRC genome reference panel. Indels and SNPs that were duplicated, multiallelic, monomorphic, or ambiguous (A/T or C/G with MAF > 0.4) were also excluded (see Supplementary Methods).<br><br>For the MRI data from chimpanzees, five of the 29 chimpanzees were excluded as FreeSurfer failed to properly parcellate the parahippocampal gyrus and entorhinal cortex. |
| Replication     | The main results were validated by using several alternative anatomical parcellation atlases and several different functional network divisions, by directly mapping the ~400 tissue samples for each donor in AHBA dataset to each of the functional networks, and by re-analyzing our data with various parameter settings, which all revealed consistent results (for details, see Supplementary Results)                                                                                                                                                                                                                                                                                                                                                |
| Randomization   | NA. Samples were not allocated into groups.                                                                                                                                                                                                                                                                                                                                                                                                                                                                                                                                                                                                                                                                                                                 |
| Blinding        | Blinding was not relevant to our study as data were obtained from previous studies and open datasets.                                                                                                                                                                                                                                                                                                                                                                                                                                                                                                                                                                                                                                                       |

## Reporting for specific materials, systems and methods

We require information from authors about some types of materials, experimental systems and methods used in many studies. Here, indicate whether each material, system or method listed is relevant to your study. If you are not sure if a list item applies to your research, read the appropriate section before selecting a response.

### Materials & experimental systems

|                                     |                                                                 |
|-------------------------------------|-----------------------------------------------------------------|
| n/a                                 | Involved in the study                                           |
| <input checked="" type="checkbox"/> | <input type="checkbox"/> Antibodies                             |
| <input checked="" type="checkbox"/> | <input type="checkbox"/> Eukaryotic cell lines                  |
| <input checked="" type="checkbox"/> | <input type="checkbox"/> Palaeontology                          |
| <input type="checkbox"/>            | <input checked="" type="checkbox"/> Animals and other organisms |
| <input type="checkbox"/>            | <input checked="" type="checkbox"/> Human research participants |
| <input checked="" type="checkbox"/> | <input type="checkbox"/> Clinical data                          |

### Methods

|                                     |                                                            |
|-------------------------------------|------------------------------------------------------------|
| n/a                                 | Involved in the study                                      |
| <input checked="" type="checkbox"/> | <input type="checkbox"/> ChIP-seq                          |
| <input checked="" type="checkbox"/> | <input type="checkbox"/> Flow cytometry                    |
| <input type="checkbox"/>            | <input checked="" type="checkbox"/> MRI-based neuroimaging |

## Animals and other organisms

Policy information about [studies involving animals](#); [ARRIVE guidelines](#) recommended for reporting animal research

|                         |                                                                                                                          |
|-------------------------|--------------------------------------------------------------------------------------------------------------------------|
| Laboratory animals      | Chimpanzees (Pan troglodytes), mean age $\pm$ standard deviation: 30.2 $\pm$ 12.6 years, all female.                     |
| Wild animals            | No wild animals were used in this study.                                                                                 |
| Field-collected samples | No field-collected samples were used in this study.                                                                      |
| Ethics oversight        | All procedures were implemented under protocols approved by the YNPRC and the Emory University Institutional Animal Care |

Ethics oversight

Note that full information on the approval of the study protocol must also be provided in the manuscript.

## Human research participants

Policy information about [studies involving human research participants](#)

Population characteristics

Recruitment

Ethics oversight

Note that full information on the approval of the study protocol must also be provided in the manuscript.

## Magnetic resonance imaging

### Experimental design

Design type

Design specifications

Behavioral performance measures

### Acquisition

Imaging type(s)

Field strength

Sequence & imaging parameters

Detailed descriptions of the MRI data from the Human Connectome Project are available at: <https://www.humanconnectome.org/study/hcp-young-adult/document/q3-data-release>

Area of acquisition

Diffusion MRI  Used  Not used

### Preprocessing

Preprocessing software

Normalization

Normalization template

Noise and artifact removal

Volume censoring

### Statistical modeling & inference

Model type and settings

Effect(s) tested

Specify type of analysis:  Whole brain  ROI-based  Both

Anatomical location(s)

Statistic type for inference (See [Eklund et al. 2016](#))

Correction

## Models & analysis

- |                                     |                                                                       |
|-------------------------------------|-----------------------------------------------------------------------|
| n/a                                 | Involvement in the study                                              |
| <input checked="" type="checkbox"/> | <input type="checkbox"/> Functional and/or effective connectivity     |
| <input checked="" type="checkbox"/> | <input type="checkbox"/> Graph analysis                               |
| <input checked="" type="checkbox"/> | <input type="checkbox"/> Multivariate modeling or predictive analysis |
